# Supplementary material for: Energy expenditure, dietary intake and energy availability in female professional football players
Source: PubMed Central journal article supplement — BMJ Open Sport Exerc Med. 2023 Feb 23;9(1):e001553. doi: 10.1136/bmjsem-2023-001553 (PMC9972418; doi:10.1136/bmjsem-2023-001553), 2023-02-23
Supplement: bmjsem-2023-001553supp003.pdf [file bmjsem-2023-001553supp003.pdf]

### Equity, diversity, and inclusion statement

The study included participants from low-, middle- and high-income countries in Europe, Asia, and The Caribbean. The author team consisted of two women and five men, including one author of color. As the study population was limited to professional football players in the region of interest, we acknowledge the bias this may generate. However, all players within the teams, regardless of ethnicity or socioeconomic status were asked to participate.
