# Supplementary figures and images for: Energy expenditure, dietary intake and energy availability in female professional football players
Source: PubMed Central journal article supplement — BMJ Open Sport Exerc Med. 2023 Feb 23;9(1):e001553. doi: 10.1136/bmjsem-2023-001553 (PMC9972418; doi:10.1136/bmjsem-2023-001553), 2023-02-23

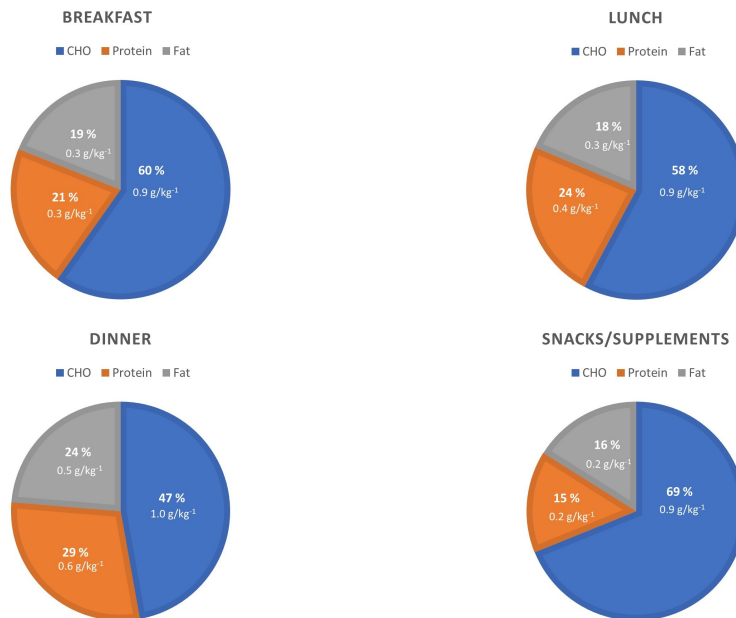

Supplement: bmjsem-2023-001553supp001.pdf [file bmjsem-2023-001553supp001.pdf]

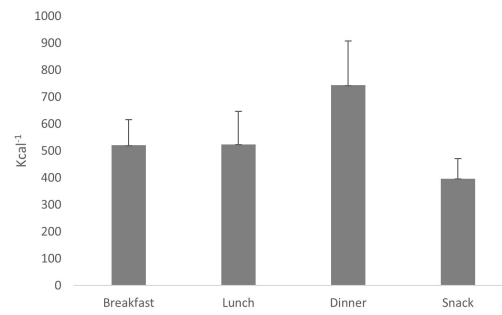

Supplement: bmjsem-2023-001553supp002.pdf [file bmjsem-2023-001553supp002.pdf]
