# Supplementary figures and images for: Energy expenditure, dietary intake and energy availability in female professional football players
Source: HighWire-hosted journal article supplement (doi:10.1136/bmjsem-2023-001553), 2023-02-01

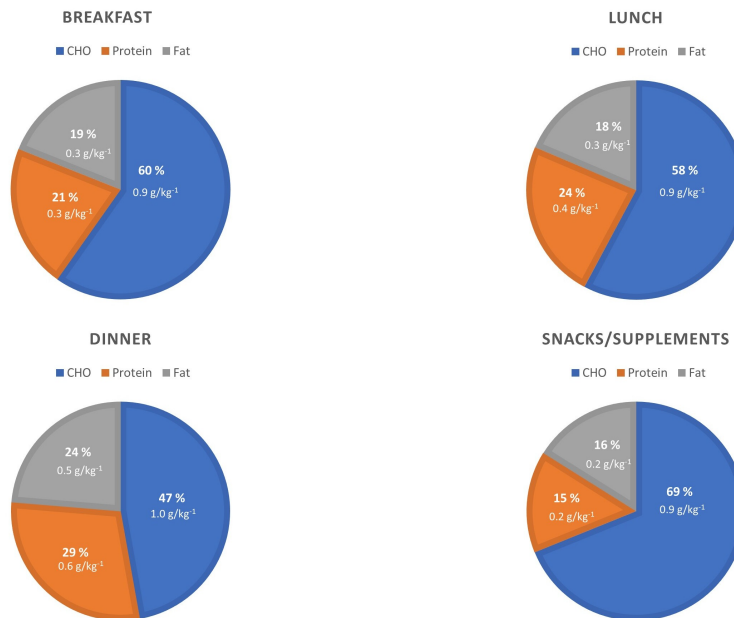

Supplement: bmjsem-2023-001553supp001_data_supplement.pdf [file bmjsem-2023-001553supp001_data_supplement.pdf]
